# Supplementary material
Source: HighWire-hosted journal article supplement (https://www.annals.org/content/suppl/2008/06/25/149.1.11)
Supplement: Huang_AT_149-1-011-DC1-1.pdf [file Huang_AT_149-1-011-DC1-1.pdf]

Appendix Table. Base-Case Model Assumptions

| Definition                                                                                                                                                                                                 | Base-Case Values                                                                                                                                                                                  |                      |                    | Study, Year (Reference)    |
|------------------------------------------------------------------------------------------------------------------------------------------------------------------------------------------------------------|---------------------------------------------------------------------------------------------------------------------------------------------------------------------------------------------------|----------------------|--------------------|----------------------------|
| <b>Patient population</b>                                                                                                                                                                                  |                                                                                                                                                                                                   |                      |                    |                            |
| <b>Demographic characteristics</b>                                                                                                                                                                         |                                                                                                                                                                                                   |                      |                    |                            |
| Age groups, age at onset of simulation                                                                                                                                                                     | 60–64, 65–69, 70–74, 75–79 (uniform distributions)                                                                                                                                                |                      |                    | --                         |
| Duration of diabetes groups, years at onset of simulation                                                                                                                                                  | 0, 0–5, 5–10, 10–15 (uniform distributions)                                                                                                                                                       |                      |                    | --                         |
| Men, %                                                                                                                                                                                                     | 47                                                                                                                                                                                                |                      |                    | Robbins et al., 2001 (34)  |
| Ethnic distribution, %                                                                                                                                                                                     | White                                                                                                                                                                                             | 71                   |                    | Robbins et al., 2001 (34)  |
|                                                                                                                                                                                                            | Black                                                                                                                                                                                             | 13                   |                    |                            |
|                                                                                                                                                                                                            | Latino                                                                                                                                                                                            | 10                   |                    |                            |
|                                                                                                                                                                                                            | Asian                                                                                                                                                                                             | 2.5                  |                    |                            |
|                                                                                                                                                                                                            | Native American                                                                                                                                                                                   | 2.5                  |                    |                            |
| <b>Comorbidity and functional status</b>                                                                                                                                                                   |                                                                                                                                                                                                   |                      |                    |                            |
| Mortality index scores at onset of simulation                                                                                                                                                              | Age group                                                                                                                                                                                         | Men                  | Women              | Lee et al., 2006 (21)      |
|                                                                                                                                                                                                            | 60–64                                                                                                                                                                                             | 3–17                 | 1–15               |                            |
|                                                                                                                                                                                                            | 65–69                                                                                                                                                                                             | 4–18                 | 2–16               |                            |
|                                                                                                                                                                                                            | 70–74                                                                                                                                                                                             | 5–19                 | 3–17               |                            |
|                                                                                                                                                                                                            | 75–79                                                                                                                                                                                             | 6–20                 | 4–18               |                            |
| <b>Cardiovascular risk factor distributions (Age-, race-, and sex-specific levels for patients with diabetes [normal distributions]) – below risk factors for 65- to 85-year-old white female patients</b> |                                                                                                                                                                                                   |                      |                    |                            |
| Mean systolic blood pressure (SD), <i>mm Hg</i>                                                                                                                                                            | 145 (33)                                                                                                                                                                                          |                      |                    | Robbins et al., 2001 (34)  |
| Mean diastolic blood pressure (SD), <i>mm Hg</i>                                                                                                                                                           | 61 (16)                                                                                                                                                                                           |                      |                    | Robbins et al., 2001 (34)  |
| Mean total cholesterol (SD), <i>mmol/L</i>                                                                                                                                                                 | 5.30 (1.29)                                                                                                                                                                                       |                      |                    | Robbins et al., 2001 (34)  |
|                                                                                                                                                                                                            | <i>mg/dl</i>                                                                                                                                                                                      |                      |                    |                            |
| Mean HDL cholesterol (SD), <i>mmol/L</i>                                                                                                                                                                   | 1.29 (0.34)                                                                                                                                                                                       |                      |                    | Robbins et al., 2001 (34)  |
|                                                                                                                                                                                                            | <i>mg/dl</i>                                                                                                                                                                                      |                      |                    |                            |
| Smoking, %*                                                                                                                                                                                                | 8                                                                                                                                                                                                 |                      |                    | Robbins et al., 2001 (34)  |
| <b>Treatment assumptions</b>                                                                                                                                                                               |                                                                                                                                                                                                   |                      |                    |                            |
| ACE inhibitor utilization, %                                                                                                                                                                               | 26                                                                                                                                                                                                |                      |                    | Grant et al., 2004 (38)    |
| Aspirin utilization, %                                                                                                                                                                                     | 12                                                                                                                                                                                                |                      |                    | Stafford et al., 2005 (39) |
| Antihypertensive therapy, %                                                                                                                                                                                | 44                                                                                                                                                                                                |                      |                    | Saydah et al., 2004 (37)   |
| <b>Diabetes-related complication modules</b>                                                                                                                                                               |                                                                                                                                                                                                   |                      |                    |                            |
| <b>Retinopathy</b>                                                                                                                                                                                         |                                                                                                                                                                                                   |                      |                    |                            |
| No retinopathy to blindness in one eye                                                                                                                                                                     | Functional form: Weibull†                                                                                                                                                                         |                      |                    | Clarke et al., 2004 (23)   |
|                                                                                                                                                                                                            | Parameter                                                                                                                                                                                         | Coefficient          |                    |                            |
|                                                                                                                                                                                                            | $\lambda$                                                                                                                                                                                         | –6.464               |                    |                            |
|                                                                                                                                                                                                            | $\gamma$                                                                                                                                                                                          | 1.154                |                    |                            |
|                                                                                                                                                                                                            | Age (Age at diagnosis – 52.59)                                                                                                                                                                    | 0.069                |                    |                            |
|                                                                                                                                                                                                            | HbA <sub>1c</sub> (A <sub>1c</sub> – 7.09)                                                                                                                                                        | 0.221                |                    |                            |
| <b>Nephropathy</b>                                                                                                                                                                                         |                                                                                                                                                                                                   |                      |                    |                            |
| No nephropathy to microalbuminuria                                                                                                                                                                         | Baseline event rate                                                                                                                                                                               |                      |                    | UKPDS, 1998 (3)            |
|                                                                                                                                                                                                            | Functional form for complication free survival with moderate glucose control: $\text{Exp}(-\text{exp}(\beta_0) \times (\text{Duration of diabetes}^{\beta_1}) \times (\text{HbA}_{1c})^{\alpha})$ |                      |                    | DCCT, 1993 (2)             |
|                                                                                                                                                                                                            | Parameter                                                                                                                                                                                         | Coefficient          |                    | CDC, 2002 (19)             |
|                                                                                                                                                                                                            | $\beta_0$                                                                                                                                                                                         | 1.348                |                    | Huang et al., 2007 (26)    |
|                                                                                                                                                                                                            | $\beta_1$                                                                                                                                                                                         | 3.622                |                    |                            |
|                                                                                                                                                                                                            | $\alpha$                                                                                                                                                                                          | –11.959              |                    |                            |
|                                                                                                                                                                                                            | Multiplier to calculate event rate with lower sugar levels (HbA <sub>1c</sub> with moderate glucose control/HbA <sub>1c</sub> with intensive glucose control) <sup>β</sup>                        |                      |                    |                            |
|                                                                                                                                                                                                            | Parameter                                                                                                                                                                                         | Coefficient          |                    |                            |
|                                                                                                                                                                                                            | $\beta$                                                                                                                                                                                           | 4.28                 |                    |                            |
|                                                                                                                                                                                                            | Microalbuminuria to gross proteinuria                                                                                                                                                             | Baseline event rate  |                    |                            |
| Functional form for complication free survival with moderate glucose control: $\text{Exp}(-\text{exp}(\beta_0) \times (\text{Duration of diabetes}^{\beta_1}) \times (\text{HbA}_{1c})^{\alpha})$          |                                                                                                                                                                                                   |                      |                    | DCCT 1993 (2)              |
| Parameter                                                                                                                                                                                                  |                                                                                                                                                                                                   | Coefficient          |                    | CDC 2002 (19)              |
| $\beta_0$                                                                                                                                                                                                  |                                                                                                                                                                                                   | 1.495                |                    | Huang et al., 2007 (26)    |
| $\beta_1$                                                                                                                                                                                                  |                                                                                                                                                                                                   | 5.727                |                    |                            |
| $\alpha$                                                                                                                                                                                                   |                                                                                                                                                                                                   | 17.810               |                    |                            |
| Multiplier to calculate event rate with lower sugar levels (HbA <sub>1c</sub> with moderate glucose control/HbA <sub>1c</sub> with intensive glucose control) <sup>β</sup>                                 |                                                                                                                                                                                                   |                      |                    |                            |
| Parameter                                                                                                                                                                                                  |                                                                                                                                                                                                   | Coefficient          |                    |                            |
| $\beta$                                                                                                                                                                                                    |                                                                                                                                                                                                   | 2.33                 |                    |                            |
| Gross proteinuria to end-stage renal disease                                                                                                                                                               |                                                                                                                                                                                                   | Duration of diabetes | Annual probability |                            |
|                                                                                                                                                                                                            | 0–11 years                                                                                                                                                                                        | 0.004                |                    |                            |
|                                                                                                                                                                                                            | 12–24 years                                                                                                                                                                                       | 0.039                |                    |                            |
|                                                                                                                                                                                                            | 25 years                                                                                                                                                                                          | 0.074                |                    |                            |

### Neuropathy

|                                             |                                                 |       |             |                          |
|---------------------------------------------|-------------------------------------------------|-------|-------------|--------------------------|
| No neuropathy to lower extremity amputation | Functional form: Weibull†                       |       |             | Clarke et al., 2004 (23) |
|                                             | Parameter                                       |       | Coefficient |                          |
|                                             | $\lambda$                                       |       | -8.718      |                          |
|                                             | $\gamma$                                        |       | 1.451       |                          |
|                                             | HbA <sub>1c</sub> ( $A_{1c} - 7.09$ )           |       | 0.435       |                          |
|                                             | Systolic blood pressure ( $[SBP - 135.09]/10$ ) |       | 0.228       |                          |
| Peripheral vascular disease                 |                                                 | 2.436 |             |                          |
| Blind                                       |                                                 | 1.812 |             |                          |

### Cardiovascular complications

Base-case models with UKPDS equations

|                        |                                                             |       |             |                           |
|------------------------|-------------------------------------------------------------|-------|-------------|---------------------------|
| Coronary heart disease | Functional form: Cox Proportional Hazards†                  |       |             | Stevens et al., 2001 (20) |
|                        | Parameter                                                   |       | Coefficient |                           |
|                        | Intercept                                                   |       | 0.011       |                           |
|                        | Age (Age at diagnosis - 55)                                 |       | 1.059       |                           |
|                        | Female sex                                                  |       | 0.525       |                           |
|                        | Smoking                                                     |       | 1.350       |                           |
|                        | HbA <sub>1c</sub> ( $A_{1c} - 6.72$ )                       |       | 1.183       |                           |
|                        | Systolic blood pressure ( $SBP - 135.7/10$ )                |       | 1.088       |                           |
|                        | Cholesterol (natural log total cholesterol/HDL cholesterol) |       | 3.845       |                           |
| Duration of diabetes   |                                                             | 1.078 |             |                           |

Stroke

|                                                                            |                                              |       |             |                           |
|----------------------------------------------------------------------------|----------------------------------------------|-------|-------------|---------------------------|
| Stroke                                                                     | Functional form: Cox Proportional Hazards†   |       |             | Kothari et al., 2002 (24) |
|                                                                            | Parameter                                    |       | Coefficient |                           |
|                                                                            | Intercept                                    |       | 0.002       |                           |
|                                                                            | Duration of diabetes                         |       | 1.145       |                           |
|                                                                            | Age (Age at diagnosis - 55)                  |       | 1.092       |                           |
|                                                                            | Female sex                                   |       | 0.700       |                           |
|                                                                            | Smoking                                      |       | 1.547       |                           |
|                                                                            | Atrial fibrillation                          |       | 8.554       |                           |
|                                                                            | Systolic blood pressure ( $SBP - 135.5/10$ ) |       | 1.122       |                           |
| Cholesterol ( $[\text{total cholesterol}/\text{HDL cholesterol}] - 5.11$ ) |                                              | 1.138 |             |                           |

Sensitivity analysis using Framingham equations

|                                         |                                            |       |          |             |                          |  |
|-----------------------------------------|--------------------------------------------|-------|----------|-------------|--------------------------|--|
| Coronary heart disease                  | Functional form: Cox Proportional Hazards† |       |          |             | Wilson et al., 1998 (48) |  |
|                                         | Parameter                                  |       |          | Coefficient |                          |  |
|                                         |                                            |       | Men      | Women       |                          |  |
|                                         | Age                                        |       | 0.048    | 0.338       |                          |  |
|                                         | Age <sup>2</sup>                           |       | -        | 0.003       |                          |  |
|                                         | Total cholesterol                          |       |          |             |                          |  |
|                                         | <4.14 mmol/L (<160 mg/dl)                  |       | -0.659   | -0.261      |                          |  |
|                                         | 4.14-5.16 mmol/L (160-199 mg/dl)           |       | Referent | Referent    |                          |  |
|                                         | 5.17-6.19 mmol/L (200-239 mg/dl)           |       | 0.177    | 0.208       |                          |  |
|                                         | 6.20-7.22 mmol/L (240-279 mg/dl)           |       | 0.505    | 0.243       |                          |  |
|                                         | ≥7.23 mmol/L (≥280 mg/dl)                  |       | 0.657    | 0.535       |                          |  |
|                                         | HDL cholesterol                            |       |          |             |                          |  |
|                                         | <0.91 mmol/L (<35 mg/dl)                   |       | 0.49744  | 0.843       |                          |  |
|                                         | 0.91-1.15 mmol/L (35-44 mg/dl)             |       | 0.24310  | 0.378       |                          |  |
|                                         | 1.16-1.28 mmol/L (45-49 mg/dl)             |       | Referent | 0.198       |                          |  |
|                                         | 1.29-1.53 mmol/L (50-59 mg/dl)             |       | -0.05107 | Referent    |                          |  |
|                                         | 1.54 mmol/L (≥60 mg/dl)                    |       | -0.48660 | -0.430      |                          |  |
|                                         | Blood pressure, mm Hg                      |       |          |             |                          |  |
|                                         | <120 and <80                               |       | 0.002    | 0.534       |                          |  |
|                                         | 120-129 or 80-84,                          |       | Referent | Referent    |                          |  |
|                                         | 130-139 or 85-89                           |       | 0.283    | 0.068       |                          |  |
|                                         | 140-159 or 90-99                           |       | 0.522    | 0.263       |                          |  |
|                                         | ≥160 or ≥100                               |       | 0.619    | 0.466       |                          |  |
|                                         | Diabetes                                   |       | 0.428    | 0.596       |                          |  |
| Smoker                                  |                                            | 0.523 | 0.292    |             |                          |  |
| Baseline survival function at 10 years† |                                            | 0.900 | 0.962    |             |                          |  |

Stroke

|        |                                            |  |       |             |                       |  |
|--------|--------------------------------------------|--|-------|-------------|-----------------------|--|
| Stroke | Functional form: Cox Proportional Hazards† |  |       |             | Wolf et al., 1991(49) |  |
|        | Parameter                                  |  |       | Coefficient |                       |  |
|        |                                            |  | Men   | Women       |                       |  |
|        | Age                                        |  | 0.051 | 0.066       |                       |  |
|        | Systolic blood pressure                    |  | 0.014 | 0.020       |                       |  |
|        | Antihypertensive therapy                   |  | 0.326 | 2.543       |                       |  |
|        | Blood pressure × therapy interaction       |  | 0     | -0.013      |                       |  |
|        | Diabetes                                   |  | 0.338 | 0.542       |                       |  |
|        | Smoker                                     |  | 0.515 | 0.529       |                       |  |
|        | Cardiovascular disease                     |  | 0.520 | 0.433       |                       |  |
|        | Atrial fibrillation                        |  | 0.606 | 1.150       |                       |  |
|        | Left ventricular hypertrophy               |  | 0.842 | 0.849       |                       |  |

For cardiovascular probabilities after incident event, please see Eastman et al., 1997 (22), and Huang et al., 2007 (26)

## Treatment effects

### ACE inhibitor effect

|                                                         |      |                                           |
|---------------------------------------------------------|------|-------------------------------------------|
| Hazard ratio for no nephropathy to microalbuminuria     | 0.32 | Rosen et al., 2005 (44)<br>HOPE 1999 (57) |
| Hazard ratio for microalbuminuria to gross proteinuria  | 0.24 | Rosen et al., 2005 (44)<br>HOPE 1999 (57) |
| Hazard ratio for proteinuria to end-stage renal disease | 0.61 | Rosen et al., 2005 (44)<br>HOPE 1999 (57) |
| Hazard ratio for coronary heart disease                 | 0.75 | Rosen et al., 2005 (44)<br>HOPE 1999 (57) |
| Hazard ratio for stroke                                 | 0.67 | Rosen et al., 2005 (44)<br>HOPE 1999 (57) |
| <b>Aspirin effect</b>                                   |      |                                           |
| Hazard ratio for coronary heart disease                 | 0.64 | Hansson et al., 1998 (58)                 |

### Background mortality rate assumptions

|                                                                                                                                    |                                                         |                                 |                                |
|------------------------------------------------------------------------------------------------------------------------------------|---------------------------------------------------------|---------------------------------|--------------------------------|
| Overall mortality rates used to calculate background mortality rates                                                               | Mortality Index Score                                   | Annual probability of mortality | Lee et al., 2006 (21)          |
|                                                                                                                                    | 1                                                       | 0.005                           |                                |
|                                                                                                                                    | 2                                                       | 0.004                           |                                |
|                                                                                                                                    | 3                                                       | 0.009                           |                                |
|                                                                                                                                    | 4                                                       | 0.016                           |                                |
|                                                                                                                                    | 5                                                       | 0.020                           |                                |
|                                                                                                                                    | 6                                                       | 0.245                           |                                |
|                                                                                                                                    | 7                                                       | 0.040                           |                                |
|                                                                                                                                    | 8                                                       | 0.054                           |                                |
|                                                                                                                                    | 9                                                       | 0.053                           |                                |
|                                                                                                                                    | 10                                                      | 0.079                           |                                |
|                                                                                                                                    | 11                                                      | 0.141                           |                                |
|                                                                                                                                    | 12                                                      | 0.136                           |                                |
|                                                                                                                                    | 13                                                      | 0.200                           |                                |
|                                                                                                                                    | ≥14                                                     | 0.225                           |                                |
| Cardiovascular mortality rate subtracted from overall mortality rate with general population risk factor levels (NHANES 1999-2002) | Functional form: Weibull†<br>Parameter                  | Coefficient                     | Anderson et al., 1990 (30)     |
|                                                                                                                                    | $\theta_0$                                              | 0.821                           |                                |
|                                                                                                                                    | $\theta_1$                                              | -0.435                          |                                |
|                                                                                                                                    | $\beta_0$                                               | -0.504                          |                                |
|                                                                                                                                    | Female                                                  | 0.224                           |                                |
|                                                                                                                                    | Log (age)                                               | 8.237                           |                                |
|                                                                                                                                    | (Log (age)) <sup>2</sup>                                | -1.211                          |                                |
|                                                                                                                                    | Log (SBP)                                               | -0.838                          |                                |
|                                                                                                                                    | Smoking                                                 | -0.162                          |                                |
|                                                                                                                                    | Log (Total cholesterol/HDL cholesterol)                 | -0.349                          |                                |
|                                                                                                                                    | Diabetes                                                | -0.083                          |                                |
|                                                                                                                                    | Diabetes × female                                       | -0.207                          |                                |
|                                                                                                                                    | Left ventricular hypertrophy                            | 0.295                           |                                |
| Background mortality rate multiplier                                                                                               |                                                         | 2.75                            | Eastman et al., 1997 (22)      |
| <b>Other assumptions*</b>                                                                                                          |                                                         |                                 |                                |
| Prevalence of peripheral vascular disease, %                                                                                       |                                                         | 14.5                            | Selvin and Erlinger, 2004 (59) |
| Prevalence of atrial fibrillation                                                                                                  | Sex- and age-specific prevalence from Kaiser population |                                 | Go et al., 2001(60)            |

### Utilities

|                                 |      |                           |
|---------------------------------|------|---------------------------|
| Blindness                       | 0.69 | Dasbach et al., 1992(41)  |
| End-stage renal disease         | 0.61 | DCCT, 1996 (27)           |
| Lower extremity amputation      | 0.68 | Redekop et al., 2004 (42) |
| Myocardial infarction or arrest | 0.88 | CDC, 2002 (19)            |
| Angina                          | 0.97 | CDC, 2002 (19)            |
| Stroke                          | 0.64 | Rosen et al., 2005 (44)   |

ACE = angiotensin-converting enzyme; CDC = Centers for Disease Control and Prevention; DCCT = Diabetes Control and Complication Trial; HbA<sub>1c</sub> = hemoglobin A<sub>1c</sub>; HDL = high-density lipoprotein; HOPE = Heart Outcomes Prevention Evaluation Study; NHANES = National Health and Nutrition Examination Surveys; SBP = systolic blood pressure; UKPDS = United Kingdom Prospective Diabetes Study.

\* Analyses assumed no uncertainty surrounding proportion of patients smoking, hazard ratios for ACE inhibitors and aspirin, or utility weights. Prevalences of peripheral vascular disease and atrial fibrillation did not differ by duration of diabetes.

† Please use technical approach described in the original publications to calculate annual probabilities. Analyses assumed no uncertainty surrounding model coefficients.
